# Supplementary material for: Cathepsin V suppresses GATA3 protein expression in luminal A breast cancer
Source: PubMed Central journal article supplement (PMC7726886; doi:10.1186/s13058-020-01376-6), 2020-12-09

**A**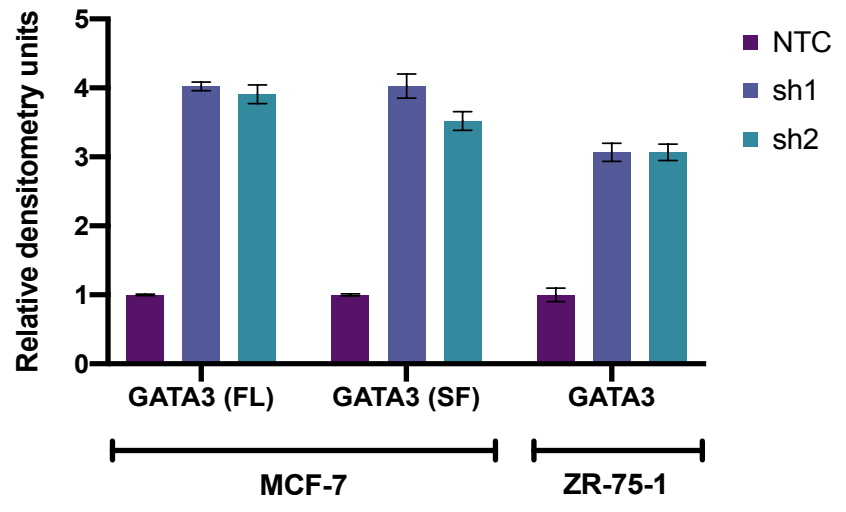**B**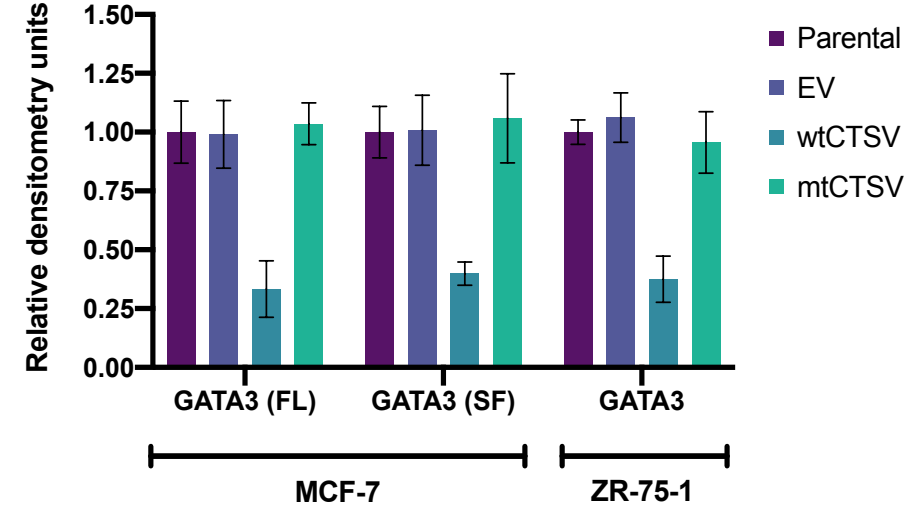

Supplement: 13058_2020_1376_MOESM2_ESM.pdf [file 13058_2020_1376_MOESM2_ESM.pdf]
