# Supplementary material for: Cathepsin V suppresses GATA3 protein expression in luminal A breast cancer
Source: Springer Nature journal article supplement (doi:10.1186/s13058-020-01376-6), 2020-12-01

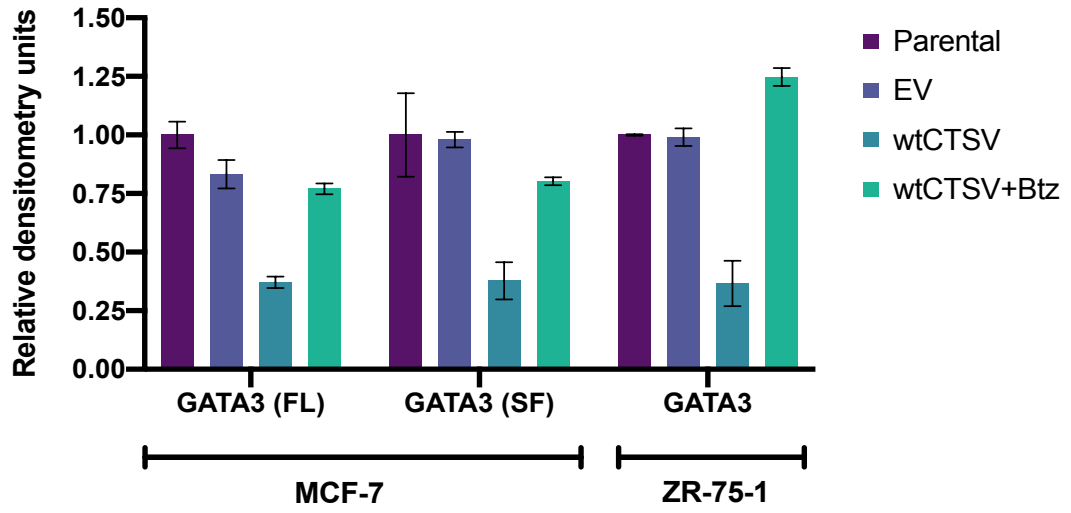

Supplement: MOESM4 [file 18670502]
